# Supplementary material for: Rapamycin Controls Lymphoproliferation and Reverses T-Cell Responses in a Patient with a Novel STIM1 Loss-of-Function Deletion
Source: PubMed Central journal article supplement (PMC10997552; doi:10.1007/s10875-024-01682-0), 2024-04-05

Figure S1

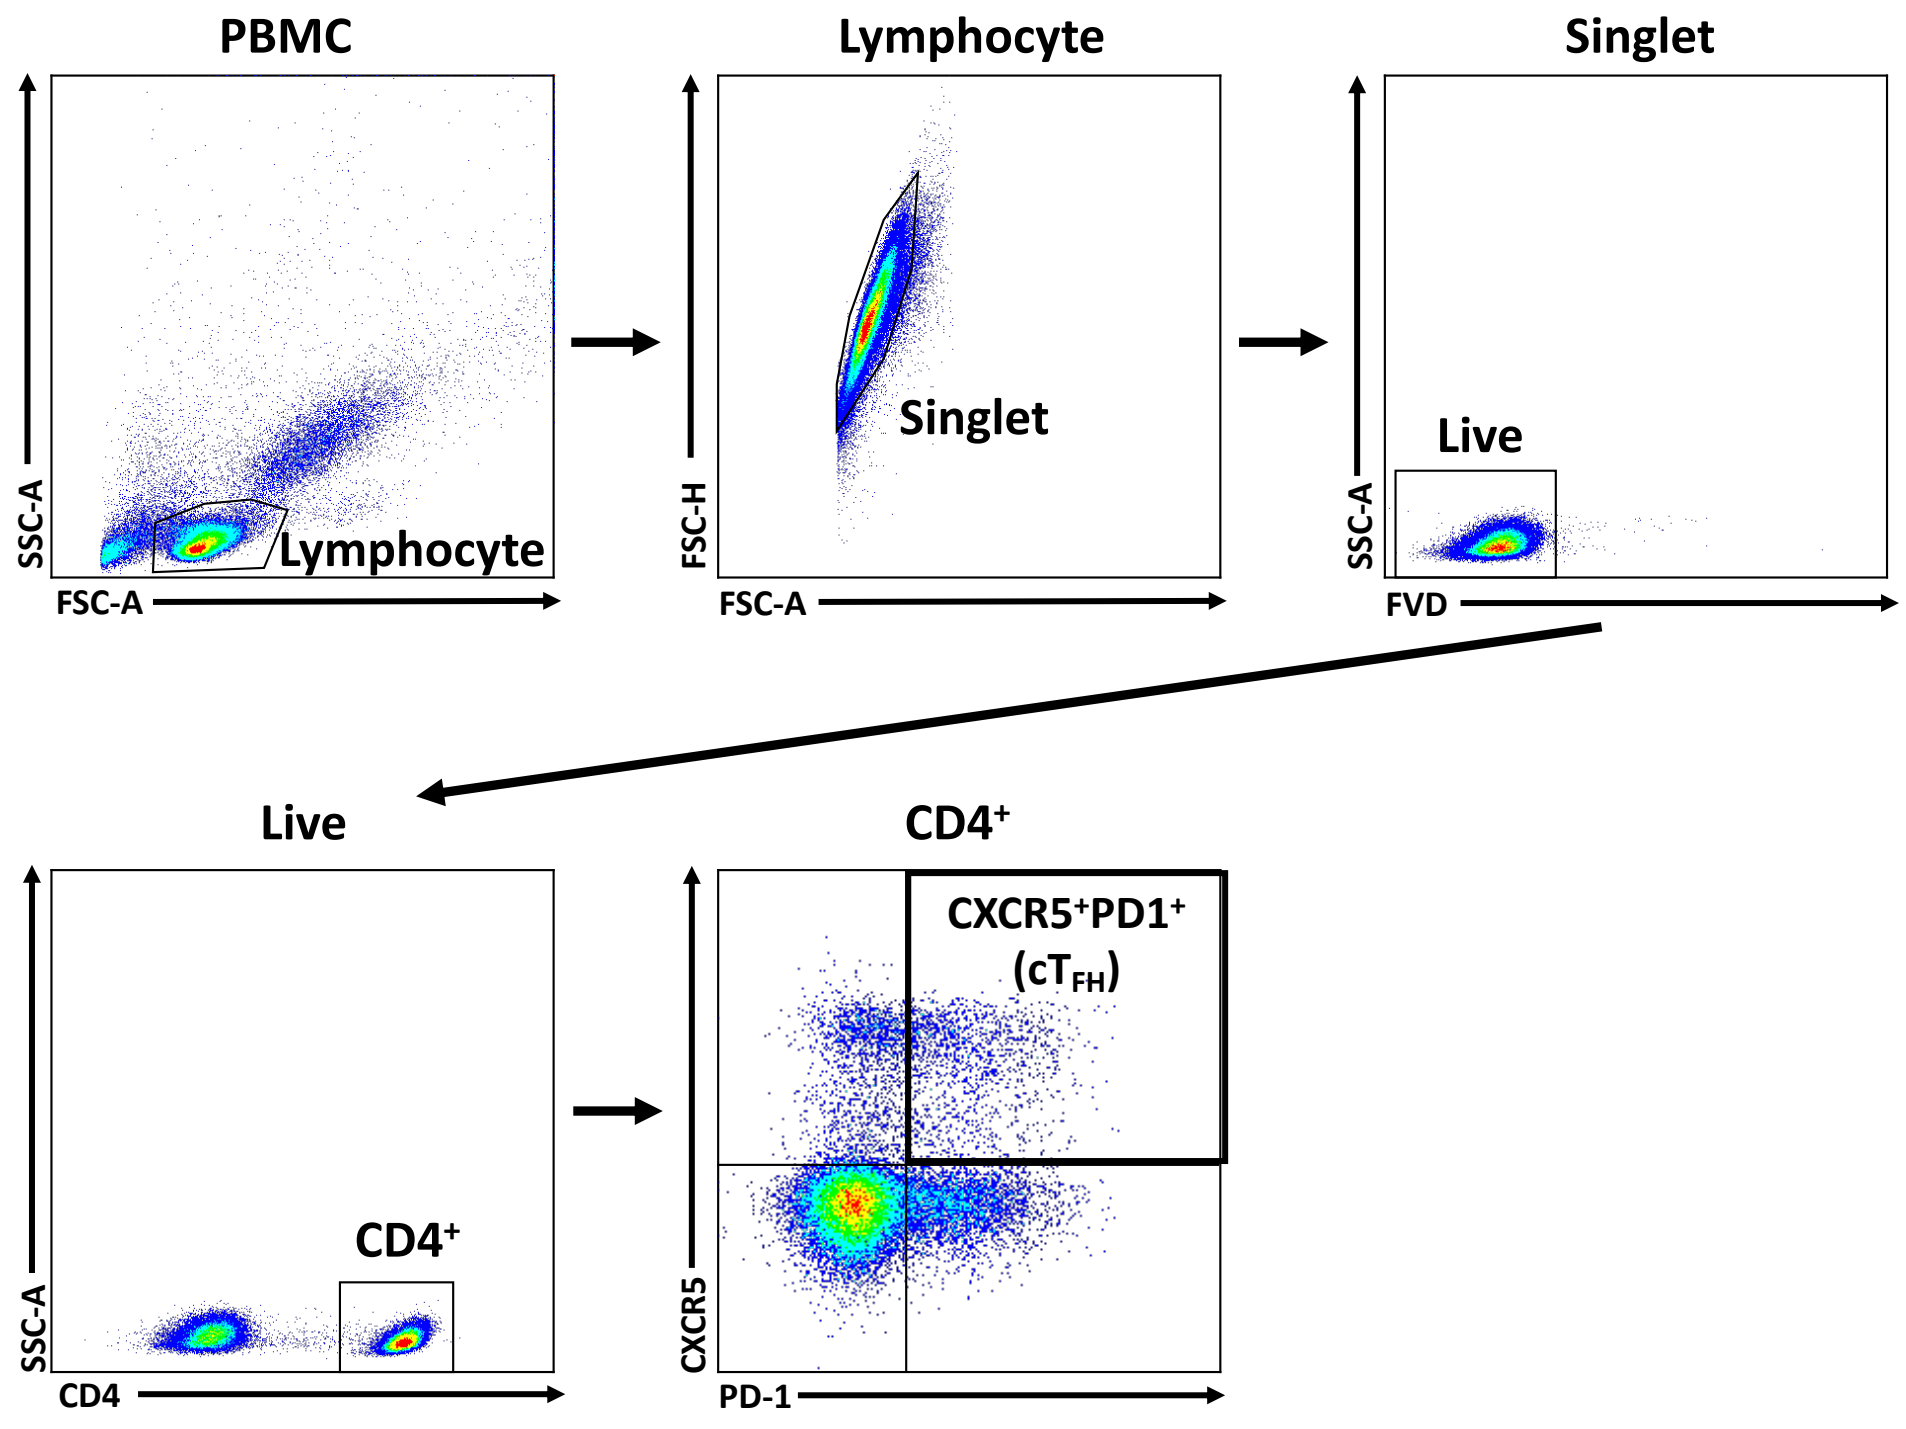

Supplement: 10875_2024_1682_MOESM1_ESM.pdf [file 10875_2024_1682_MOESM1_ESM.pdf]
